# Supplementary material for: Reactive landing of peptide ions on self-assembled monolayer surfaces: an alternative approach for covalent immobilization of peptides on surfaces
Source: Royal Society of Chemistry journal article supplement (doi:10.1039/b717617a), 2008-01-01
Supplement: b717617a.pdf [file b717617a.pdf]

# Reactive Landing of Peptide Ions on Self-Assembled Monolayer Surfaces: An Alternative Approach for Covalent Immobilization of Peptides on Surfaces

Peng Wang, Omar Hadjar, Paul L. Gassman and Julia Laskin\*

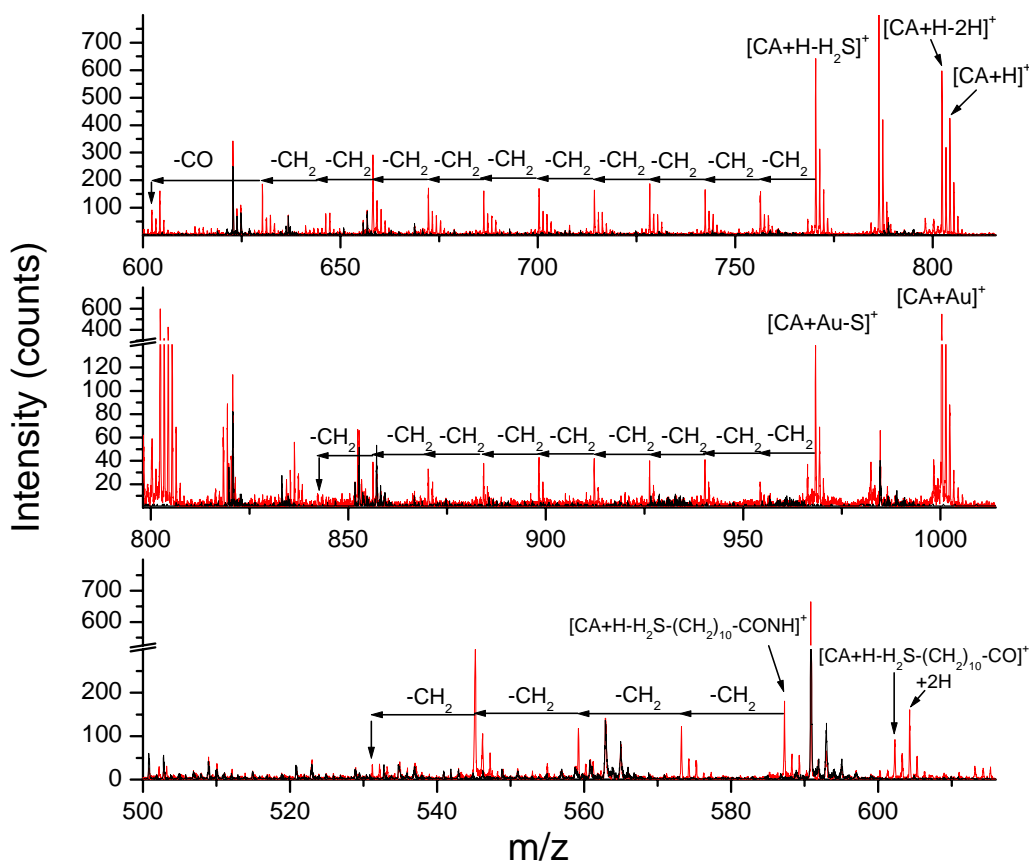

**Figure S1.** ToF-SIMS spectrum of the NHS-SAM surface following SL of  $1.8 \times 10^{13}$  doubly protonated c(-RGDfK-) molecules and subsequent rinsing of the surface in methanol (red) as shown in Figure 1b with detailed peak assignments and the unmodified NHS-SAM (black). Top panel shows the protonated doublet at m/z 804.4 and 802.4 of the covalent adduct (CA) and the related fragments; middle panel shows the CA cationized on gold and the related fragments; bottom panel shows lower-mass part of the spectrum that contains characteristic peaks corresponding to the loss of NHCO from the amide bond between c(-RGDfK-) and the SAM chain and loss of up to four  $-CH_2$  moieties from the lysine side chain of c(-RGDfK-).
